# Supplementary material
Source: PubMed Central journal article supplement (PMC2913455)
Supplement: supp_blood-2009-12-259556_Document1.pdf [file supp_blood-2009-12-259556_Document1.pdf]

## Reagents

Murine P-, L-, and E-selectin-IgM Fc chimeras and control CD45-IgM Fc chimera were described previously.<sup>1</sup> Human E-selectin-IgG Fc chimera was expressed and purified as described for human L-selectin-IgG Fc.<sup>2</sup> Human P-selectin was isolated from platelets as described.<sup>3</sup> Human recombinant soluble ICAM-1 and murine recombinant ICAM-1-Fc, CXCL1, and TNF- $\alpha$  were purchased from R&D Systems. Rat anti-murine E-selectin mAb 9A9<sup>4</sup> was a gift from Barry Wolitzky (MitoKor, San Diego, CA). Rat anti-murine P-selectin mAb RB40.34<sup>5</sup> and rat anti-murine PSGL-1 mAb 4RA10<sup>6</sup> were gifts from Dietmar Vestweber (Max Planck Institute of Biomolecular Medicine, Muenster, Germany). Murine anti-human  $\alpha$ L $\beta$ 2 mAb TS1/22 was from Thermo Scientific. Murine anti-human  $\alpha$ M $\beta$ 2 mAb was from Dako. Murine anti-human ICAM-1 mAb LB-2 was from BD Biosciences. The following mAbs to murine proteins were purchased from BD Biosciences: rat anti- $\alpha$ L $\beta$ 2 (M17/4), rat anti- $\alpha$ M $\beta$ 2 (M1/70), rat anti- $\beta$ 2 integrin (GAME46), hamster anti-ICAM-1 (3E2), PE-labeled rat anti-PSGL-1 mAb (2PH1), FITC-labeled rat anti-L-selectin (Mel-14), FITC-labeled rat anti-CD44 (IM7), and Cy5-labeled Y416 in the catalytic domain of all activated SFKs), Syk, phospho-Syk, p38, phospho-p38, and Btk, and goat horseradish peroxidase-conjugated anti-rabbit IgG were obtained from Cell Signaling Technology. Rabbit antibodies to murine Fgr, Hck, and Lyn and goat antibody to murine Btk were from Santa Cruz. Goat anti-human IgG Fc antibody was from Chemicon. Goat anti-human IgM Fc antibody was from Caltag. Murine anti-phosphotyrosine antibody 4G10 was from Millipore. Goat horseradish peroxidase-conjugated anti-mouse IgG and streptavidin were from Thermo Scientific. Signaling inhibitors were purchased from Calbiochem.

## Mice

PSGL-1<sup>-/-</sup> mice were generated as described.<sup>1</sup> C57BL/6J and CD44<sup>-/-</sup> mice were purchased from The Jackson Laboratory. PSGL-1<sup>-/-</sup> mice were bred with CD44<sup>-/-</sup> mice to generate double heterozygous mice; these mice were bred to generate PSGL-1<sup>-/-</sup>/CD44<sup>-/-</sup> mice. SHIP-1<sup>-/-</sup> mice<sup>7</sup> were a gift from Gerald Krystal (Terry Fox Laboratory, BC Cancer Agency, Vancouver, BC). DAP12<sup>-/-</sup>/FcR $\gamma$ <sup>-/-</sup> mice<sup>8</sup> and Fgr<sup>-/-</sup>/Hck<sup>-/-</sup>/Lyn<sup>-/-</sup> mice<sup>9</sup> were a gift from Clifford Lowell (University of California, San Francisco). Fgr<sup>-/-</sup>/Hck<sup>-/-</sup>/Lyn<sup>-/-</sup> mice were bred with C57BL/6J mice to generate Fgr<sup>-/-</sup>, Hck<sup>-/-</sup>, Lyn<sup>-/-</sup>, and Hck<sup>-/-</sup>/Lyn<sup>-/-</sup> mice. LysM-GFP<sup>+</sup> mice<sup>10</sup> were provided by Klaus Ley (La Jolla Institute for Allergy and Immunology). Btk<sup>-/-</sup> mice,<sup>11</sup> originally from Wasif Khan (Vanderbilt University), were supplied by Carol Webb (Oklahoma Medical Research Foundation). PI3K $\gamma$ <sup>-/-</sup> mice,<sup>12,13</sup> originally from Joseph Penninger (Institute of Molecular Biotechnology of the Austrian Academy of Sciences), were provided by Paul Kubers (University of Calgary). PI3K $\delta$ <sup>-/-</sup> mice<sup>14</sup> were provided by James Ihle (St. Jude Children's Research Hospital). Chimeric mice were generated by bone marrow transplantation as described previously.<sup>15</sup> WT recipient mice were irradiated lethally (9.5 Gy). After irradiation, a 1:1 mixture injected i.v. into recipients. Experiments were performed 8 weeks after bone marrow transplantation. All mouse experiments were performed in compliance with protocols approved by the Institutional Animal Care and Use Committee of the Oklahoma Medical Research Foundation.

## Cells

Murine bone marrow leukocytes were isolated as described previously.<sup>16</sup> Briefly, bone marrow cells were isolated by gently flushing femurs and tibias with 10 ml Hanks' balanced salt solution

(HBSS) without  $\text{Ca}^{2+}$  or  $\text{Mg}^{2+}$ . Red blood cells were lysed by adding 5 ml lysis buffer (150 mM  $\text{NH}_4\text{Cl}$ , 10 mM  $\text{NaHCO}_3$ , 1 mM EDTA) to 0.5 ml bone marrow cells. The cells were incubated for 20 s, and then 5 ml HBSS was immediately added. After centrifugation at  $100 \times g$  for 5 min, the cells were resuspended at  $2 \times 10^6/\text{ml}$  in HBSS containing 1.26 mM  $\text{Ca}^{2+}$ , 0.81 mM  $\text{Mg}^{2+}$ , and 0.5% human serum albumin. Human neutrophils were isolated as described previously.<sup>17</sup>

### **Flow chamber assay**

For studies with murine leukocytes, a goat antibody against the Fc portion of human IgM (10  $\mu\text{g}/\text{ml}$ ) was adsorbed on 35-mm polystyrene dishes. For some experiments, 20  $\mu\text{g}/\text{ml}$  murine ICAM-1-Fc chimera and 10  $\mu\text{g}/\text{ml}$  murine CXCL1 were also adsorbed. Dishes were blocked in 1% human serum albumin, after which murine P-selectin-IgM or E-selectin-IgM was captured on the dish. For studies with human neutrophils, a goat antibody against the Fc portion of human IgG (10  $\mu\text{g}/\text{ml}$ ) was adsorbed on dishes. For some experiments, 20  $\mu\text{g}/\text{ml}$  human ICAM-1 was also adsorbed. After blocking the dish with 1% human serum albumin, human E-selectin-IgG was captured on the dish. Alternatively, P-selectin (1  $\mu\text{g}/\text{ml}$ ) isolated from human platelets was perfused over P-selectin or E-selectin in dishes mounted in a parallel-plate flow chamber at a wall shear stress of 1 dyne/cm<sup>2</sup>. Site densities of immobilized murine adhesion proteins were measured by binding of <sup>125</sup>I-labeled anti-P-selectin mAb RB40.34, anti-E-selectin mAb 9A9, or anti-ICAM-1 mAb 3E2. Human neutrophils or murine bone marrow leukocytes were suspended at  $10^6/\text{ml}$  in HBSS with 0.5% human serum albumin. In some experiments, dishes were preincubated with 20  $\mu\text{g}/\text{ml}$  anti-P-selectin mAb, anti-E-selectin mAb, anti-ICAM-1 mAb, or isotype-matched control mAb, or 20  $\mu\text{g}/\text{ml}$  anti- $\alpha\text{L}\beta 2$  and/or anti- $\alpha\text{M}\beta 2$  mAb were included in the cell suspension. For some studies, cells were preincubated with 25  $\mu\text{g}/\text{ml}$  OSGE (Cedar Lane) for 20 min at 37°C.<sup>16</sup> In other studies, cells were incubated for 30 min at room temperature with the Syk inhibitor piceatannol (20  $\mu\text{M}$ ), the SFK inhibitor PP2 (20  $\mu\text{M}$ ) or its inactive analogue PP3 (20  $\mu\text{M}$ ), the PI3K inhibitor LY294002 (50  $\mu\text{M}$ ), the Tec kinase inhibitor LFM-A13 (50  $\mu\text{M}$ ), or the p38 inhibitor SB203580 (50  $\mu\text{M}$ ), or an equal volume of DMSO as a vehicle control. To disrupt lipid rafts, cells were preincubated with 10 mM M $\beta$ CD with or without 15% FBS, 10  $\mu\text{M}$   $\alpha$ -cyclodextrin, or 5  $\mu\text{g}/\text{ml}$  filipin III for 30 min at 37°C.<sup>18</sup> After 5 min, cells were analyzed using a videomicroscopy system coupled to a digital analysis system on a Silicon Graphics workstation. Velocities of rolling cells were measured over a 5-s interval.

### **SFK, Syk, Btk, and p38 phosphorylation**

6-well plates were coated with anti-human IgM Fc antibody and incubated with E-selectin-IgM or P-selectin-IgM. Bone marrow leukocytes suspended in Hanks' balanced salt solution with  $\text{Ca}^{2+}$  and  $\text{Mg}^{2+}$  containing 0.5% human serum albumin were incubated in selectin-coated plates on a rotary shaker at 65 rpm for 5 min. The cells were lysed with 1% Triton X-100, 125 mM NaCl, 50 mM Tris pH 8.0, 10 mM EDTA, 10 mM NaF, 10 mM sodium pyrophosphate, pepstatin, 50  $\mu\text{g}/\text{ml}$  bestatin, 2 mM PMSF, 0.1% SDS, and 0.5% sodium deoxycholate. Cell lysates were analyzed by Western blotting,<sup>16</sup> using rabbit antibodies against phospho-SFK (Y416), Syk, phospho-Syk, p38, phospho-p38, or Btk. To examine phosphorylation of Fgr, Hck, Lyn, or Btk, lysates were incubated with protein G agarose for 3 h at 4°C and centrifuged. The precleared lysates were incubated with rabbit antibodies to Fgr, Hck, Lyn, or goat antibody to Btk at 4°C overnight and then with protein G agarose for 3 h at 4°C. After washing the beads, bound proteins were eluted by boiling in SDS-PAGE sample buffer and analyzed by Western

blotting with antibodies to phosphotyrosine, Btk, and phospho-SFK, or with biotinylated antibodies to Fgr, Hck, and Lyn.

### **Intravital microscopy**

Mice were anesthetized by i.p. injection of 1.25% Avertin (tribromoethanol/amylen hydrate, 0.2 ml/10 g body weight). After tracheal intubation, the right carotid artery was cannulated for systemic administration of mAbs and blood sampling for leukocyte counts. The cremaster muscle was superfused with thermocontrolled (35°C) bicarbonate-buffered saline 3.5 to 4 h after intrascrotal injection of 500 ng murine TNF- $\alpha$ . Microvessel diameters, hemodynamic parameters, and mean leukocyte rolling velocities were analyzed offline. All neutrophil rolling in cremasteric muscle venules 4 h after TNF- $\alpha$  stimulation was blocked by a combination of mAbs to P- and E-selectin, excluding a contribution of L-selectin to rolling at this time point. In some experiments, 50  $\mu$ g anti-P-selectin mAb or anti- $\beta$ 2 integrin mAb was injected i.v. Some mice received 4  $\mu$ g pertussis toxin (PTx) i.v. 2 h before cremaster muscle exteriorization. In other experiments,  $10^7$  bone marrow leukocytes from WT or gene-targeted mice were labeled at room temperature for 5 min with red (PKH26) or green (PKH67) fluorescence dye (Sigma) and then was incubated with 200 ng/ml PTx at 37°C for 2 h, and then injected i.v. 2 h after intrascrotal injection of TNF- $\alpha$ .

### **Thioglycollate-induced peritonitis**

Mice were injected i.p. with 1 ml of 4% thioglycollate. Some mice received 4  $\mu$ g PTx i.v. 2 h before thioglycollate injection. After 4 h, peritoneal cells were collected with 10 ml PBS containing 0.1% BSA and 5 mM EDTA, and the cells were analyzed by flow cytometry. Neutrophils were counted based on scatter properties and high expression of Gr-1.<sup>19</sup>

### **Competitive neutrophil recruitment assay**

Competitive recruitment was performed as described.<sup>20</sup> Bone marrow leukocytes from WT or gene-targeted mice were labeled with red (PKH26) or green (PKH67) fluorescent dye. The labeled cells were resuspended in HBSS at  $10^8$  cells/ml and mixed at a 1:1 ratio. Some labeled cells and recipient mice were pretreated with PTx. Recipient WT mice were injected with 1 ml of 4% thioglycollate i.p., and the labeled cell mixture (200  $\mu$ l per mouse) was then injected retroorbitally. After 4 h blood was collected. The mice were then sacrificed, and peritoneal cells were collected with 10 ml PBS containing 0.1% BSA and 5 mM EDTA. Neutrophils were counted in blood and peritoneal exudate as described above. In all experiments,  $10^4$  to  $2 \times 10^5$  fluorescent neutrophils were recovered from the peritoneum. The data were plotted as the ratio of PKH26-labeled neutrophils from the indicated population compared to PKH67-labeled WT neutrophils in blood or peritoneal lavage.

### **Statistics**

The unpaired Student *t* test was used to determine P values as indicated in the figures.

### **REFERENCES**

1. Xia L, Sperandio M, Yago T, et al. P-selectin glycoprotein ligand-1-deficient mice have impaired leukocyte tethering to E-selectin under flow. *J Clin Invest.* 2002;109:939–950.
2. Sarangapani KK, Yago T, Klopocki AG, et al. Low force decelerates L-selectin dissociation from P-selectin glycoprotein ligand-1 and endoglycan. *J Biol Chem.* 2004;279:2291–2298.
3. Moore KL, Eaton SF, Lyons DE, Lichenstein HS, Cummings RD, McEver RP. The P-selectin glycoprotein ligand from human neutrophils displays sialylated, fucosylated, O-linked poly-N-acetyllactosamine. *J Biol Chem.* 1994;269:23318–23327.
4. Labow MA, Norton CR, Rumberger JM, et al. Characterization of E-selectin-deficient mice: demonstration of overlapping function of the endothelial selectins. *Immunity.* 1994;1:709–720.
5. Ley K, Bullard DC, Arbonés ML, et al. Sequential contribution of L- and P-selectin to leukocyte rolling in vivo. *J Exp Med.* 1995;181:669–675.
6. Frenette PS, Denis CV, Weiss L, et al. P-selectin glycoprotein ligand 1 (PSGL-1) is expressed on platelets and can mediate platelet-endothelial interactions in vivo. *J Exp Med.* 2000;191:1413–1422.
7. Helgason CD, Damen JE, Rosten P, et al. Targeted disruption of SHIP leads to hemopoietic perturbations, lung pathology, and a shortened life span. *Genes Dev.* 1998;12:1610-1620.
8. Mocsai A, Abram CL, Jakus Z, Hu Y, Lanier LL, Lowell CA. Integrin signaling in neutrophils and macrophages uses adaptors containing immunoreceptor tyrosine-based activation motifs. *Nat Immunol.* 2006;7:1326–1333.
9. Meng F, Lowell CA. Lipopolysaccharide (LPS)-induced macrophage activation and signal transduction in the absence of Src-family kinases Hck, Fgr, and Lyn. *J Exp Med.* 1997;185:1661–1670.
10. Faust N, Varas F, Kelly LM, Heck S, Graf T. Insertion of enhanced green fluorescent protein into the lysozyme gene creates mice with green fluorescent granulocytes and macrophages. *Blood.* 2000;96:719–726.
11. Khan WN, Alt FW, Gerstein RM, et al. Defective B cell development and function in Btk-deficient mice. *Immunity.* 1995;3:283–299.
12. Sasaki T, Irie-Sasaki J, Jones RG, et al. Function of PI3K $\gamma$  in thymocyte development, T cell activation, and neutrophil migration. *Science.* 2000;287:1040–1046.
13. Liu L, Puri KD, Penninger JM, Kubes P. Leukocyte PI3K $\gamma$  and PI3K $\delta$  have temporally distinct roles for leukocyte recruitment in vivo. *Blood.* 2007;110:1191–1198.
14. Jou ST, Carpino N, Takahashi Y, et al. Essential, nonredundant role for the phosphoinositide 3-kinase p110 $\delta$  in signaling by the B-cell receptor complex. *Mol Cell Biol.* 2002;22:8580–8591.

15. Yao L, Yokota T, Xia L, Kincade PW, McEver RP. Bone marrow dysfunction in mice lacking the cytokine receptor gp130 in endothelial cells. *Blood*. 2005;106:4093–4101.
16. Miner JJ, Xia L, Yago T, et al. Separable requirements for cytoplasmic domain of PSGL-1 in leukocyte rolling and signaling under flow. *Blood*. 2008;112:2035–2045.
17. Zimmerman GA, McIntyre TM, Prescott SM. Thrombin stimulates the adherence of neutrophils to human endothelial cells in vitro. *J Clin Invest*. 1985;76:2235–2246.
18. Setiadi H, McEver RP. Clustering endothelial E-selectin in clathrin-coated pits and lipid rafts enhances leukocyte adhesion under flow. *Blood*. 2008;111:1989–1998.
19. Mocsai A, Zhou M, Meng F, Tybulewicz VL, Lowell CA. Syk is required for integrin signaling in neutrophils. *Immunity*. 2002;16:547–558.
20. Carlow DA, Ziltener HJ. CD43 deficiency has no impact in competitive in vivo assays of neutrophil or activated T cell recruitment efficiency. *J Immunol*. 2006;177:6450–6459.
