# Supplementary material
Source: PubMed Central journal article supplement (PMC2913455)
Supplement: supp_blood-2009-12-259556_TableS1.pdf [file supp_blood-2009-12-259556_TableS1.pdf]

| Mouse genotype                                | Anti-P-sel | Anti- $\beta$ 2 | PTx | Mice (n) | Venules (n) | Diameter ( $\mu$ m) | Centerline velocity ( $\mu$ m/s) | Wall shear rate ( $s^{-1}$ ) |
|-----------------------------------------------|------------|-----------------|-----|----------|-------------|---------------------|----------------------------------|------------------------------|
| WT                                            | -          | -               | -   | 18       | 43          | 34 $\pm$ 4          | 2,100 $\pm$ 100                  | 650 $\pm$ 30                 |
|                                               | +          | -               | -   | 18       | 40          | 34 $\pm$ 6          | 2,100 $\pm$ 200                  | 680 $\pm$ 50                 |
|                                               | +          | +               | -   | 17       | 38          | 33 $\pm$ 4          | 2,100 $\pm$ 150                  | 680 $\pm$ 40                 |
|                                               | +          | -               | +   | 13       | 32          | 33 $\pm$ 3          | 2,000 $\pm$ 200                  | 640 $\pm$ 30                 |
|                                               | +          | +               | +   | 12       | 31          | 32 $\pm$ 3          | 1,900 $\pm$ 100                  | 630 $\pm$ 30                 |
| CD44 <sup>-/-</sup>                           | -          | -               | -   | 5        | 19          | 29 $\pm$ 3          | 1,800 $\pm$ 150                  | 660 $\pm$ 40                 |
|                                               | +          | -               | -   | 5        | 18          | 28 $\pm$ 4          | 2,000 $\pm$ 150                  | 700 $\pm$ 40                 |
|                                               | +          | +               | -   | 5        | 17          | 28 $\pm$ 3          | 1,800 $\pm$ 150                  | 680 $\pm$ 50                 |
| PSGL-1 <sup>-/-</sup>                         | -          | -               | -   | 6        | 23          | 32 $\pm$ 4          | 1,900 $\pm$ 200                  | 630 $\pm$ 60                 |
|                                               | +          | -               | -   | 5        | 22          | 33 $\pm$ 4          | 1,900 $\pm$ 100                  | 620 $\pm$ 30                 |
|                                               | +          | +               | -   | 5        | 19          | 34 $\pm$ 4          | 2,000 $\pm$ 150                  | 630 $\pm$ 40                 |
| PSGL-1 <sup>-/-</sup><br>/CD44 <sup>-/-</sup> | -          | -               | -   | 5        | 21          | 38 $\pm$ 4          | 2,200 $\pm$ 100                  | 620 $\pm$ 50                 |
|                                               | +          | -               | -   | 4        | 18          | 40 $\pm$ 5          | 2,500 $\pm$ 200                  | 660 $\pm$ 50                 |
|                                               | +          | +               | -   | 4        | 17          | 39 $\pm$ 5          | 2,300 $\pm$ 150                  | 630 $\pm$ 40                 |
| Btk <sup>-/-</sup>                            | -          | -               | -   | 5        | 20          | 35 $\pm$ 5          | 2,200 $\pm$ 100                  | 670 $\pm$ 40                 |
|                                               | +          | -               | -   | 4        | 18          | 35 $\pm$ 5          | 2,100 $\pm$ 100                  | 640 $\pm$ 30                 |
|                                               | +          | +               | -   | 4        | 16          | 34 $\pm$ 4          | 2,200 $\pm$ 200                  | 690 $\pm$ 60                 |

Diameter, centerline velocity, and wall shear rate are presented as mean  $\pm$  SEM of all investigated venules.
